# Supplementary material for: Construct validity of the Chelsea critical care physical assessment tool: an observational study of recovery from critical illness
Source: PubMed Central journal article supplement (PMC4056321; doi:10.1186/cc13801), 2014-03-27

The Chelsea Critical Care Physical Assessment tool (CPAx)

| Aspect of Physicality                                                                 | Level 0                                                                                  | Level 1                                                                | Level 2                                                                                     | Level 3                                                                                                                                   | Level 4                                                                                                  | Level 5                                                                                                |
|---------------------------------------------------------------------------------------|------------------------------------------------------------------------------------------|------------------------------------------------------------------------|---------------------------------------------------------------------------------------------|-------------------------------------------------------------------------------------------------------------------------------------------|----------------------------------------------------------------------------------------------------------|--------------------------------------------------------------------------------------------------------|
| <b>Respiratory Function</b>                                                           | Complete ventilator dependence. Mandatory breaths only. May be fully sedated/ paralysed. | Ventilator dependence. Mandatory breaths with some spontaneous effort. | Spontaneously breathing with continuous invasive or non-invasive ventilatory support.       | Spontaneously breathing with intermittent invasive or non-invasive ventilatory support <b>Or</b> continuous high flow oxygen (>15litres). | Receiving standard oxygen therapy (<15 litres).                                                          | Self-ventilating with no oxygen therapy.                                                               |
| <b>Cough</b>                                                                          | Absent cough, may be fully sedated or paralysed.                                         | Cough stimulated on deep suctioning only.                              | Weak ineffective voluntary cough, unable to clear independently e.g. requires deep suction. | Weak, partially effective voluntary cough, sometimes able to clear secretions e.g. requires yanker suctioning.                            | Effective cough, clearing secretions with airways clearance techniques.                                  | Consistent effective voluntary cough, clearing secretions independently.                               |
| <b>Moving Within the Bed e.g. rolling.</b>                                            | Unable, maybe fully sedated/ paralysed.                                                  | Initiates movement. Requires assistance ≥ 2 people (maximal).          | Initiates movement. Requires assistance ≥1 person (moderate).                               | Initiates movement. Requires assistance 1 person (minimal).                                                                               | Independent in ≥3 seconds.                                                                               | Independent in <3 seconds.                                                                             |
| <b>Supine to Sitting on the Edge of the Bed.</b>                                      | Unable/ Unstable.                                                                        | Initiates movement. Requires assistance ≥ 2 people (maximal).          | Initiates movement. Requires assistance ≥1 person (moderate).                               | Initiates movement. Requires assistance 1 person (minimal).                                                                               | Independent in ≥3 seconds.                                                                               | Independent in <3 seconds.                                                                             |
| <b>Dynamic Sitting (i.e. when sitting on the edge of the bed/unsupported sitting)</b> | Unable/ Unstable                                                                         | Requires assistance ≥2 people (maximal).                               | Requires assistance ≥1 person (moderate).                                                   | Requires assistance 1 person (minimal).                                                                                                   | Independent with some dynamic sitting balance, i.e. able to alter trunk position within base of support. | Independent with full dynamic sitting balance, i.e. able to reach out of base of support.              |
| <b>Standing Balance</b>                                                               | Unable/ unstable/ bedbound.                                                              | Tilt table or similar                                                  | Standing hoist or similar.                                                                  | Dependant on frame, crutches or similar.                                                                                                  | Independent without aides.                                                                               | Independent without aids and full dynamic standing balance, i.e. able to reach out of base of support. |
| <b>Sit to Stand</b> (Starting position: ≤ 90 degrees hip flexion)                     | Unable/ Unstable.                                                                        | Sit to stand with maximal assistance e.g. standing hoist or similar.   | Sit to stand with moderate assistance e.g. 1-2 people.                                      | Sit to stand with minimal assistance e.g. 1 person.                                                                                       | Sit to stand independently pushing through arms of the chair.                                            | Sit to stand independently without upper limb involvement.                                             |
| <b>Transferring from Bed to Chair.</b>                                                | Unable/ Unstable.                                                                        | Full hoist.                                                            | Standing hoist or similar.                                                                  | Pivot transfer (no stepping) with mobility aid or physical                                                                                | Stand and step transfer with mobility aid OR physical                                                    | Independent transfer without equipment.                                                                |

The Chelsea Critical Care Physical Assessment tool (CPAx)

|                                                                                    |                   |                                     |                                                           |                                                       |                                               |                          |
|------------------------------------------------------------------------------------|-------------------|-------------------------------------|-----------------------------------------------------------|-------------------------------------------------------|-----------------------------------------------|--------------------------|
|                                                                                    |                   |                                     |                                                           | assistance.                                           | assistance.                                   |                          |
| <b>Stepping</b>                                                                    | Unable/ Unstable. | Using a standing hoist, or similar. | Using mobility aids AND assistance > 1 person (moderate). | Using mobility aid AND assistance 1 person (minimal). | Using mobility aid OR assistance 1 (minimal). | Independent without aid. |
| <b>Grip Strength</b><br>(predicted mean for age and gender on the strongest hand.) | Unable to assess. | < 20%                               | < 40%                                                     | < 60%                                                 | < 80%                                         | ≥80%                     |

The Chelsea Critical Care Physical Assessment tool (CPAx)

| Age   | Men  |       |       |       |       |       |       | Women |       |      |       |       |       |       |
|-------|------|-------|-------|-------|-------|-------|-------|-------|-------|------|-------|-------|-------|-------|
|       | Hand | Mean  | <20%  | <40%  | <60%  | <80%  | ≥80%  | Hand  | Mean  | <20% | <40%  | <60%  | <80%  | ≥80%  |
| 15-19 | R    | 46.91 | 9.38  | 18.76 | 28.15 | 37.53 | 37.53 | R     | 28.82 | 5.76 | 11.53 | 17.29 | 23.06 | 23.06 |
|       | L    | 42.13 | 8.43  | 16.85 | 25.28 | 33.70 | 33.70 | L     | 24.98 | 5.00 | 9.99  | 14.99 | 19.98 | 19.98 |
| 20-24 | R    | 48.15 | 9.63  | 19.26 | 28.89 | 38.52 | 38.52 | R     | 28.33 | 5.67 | 11.33 | 17.00 | 22.66 | 22.66 |
|       | L    | 43.08 | 8.62  | 17.23 | 25.85 | 34.46 | 34.46 | L     | 25.78 | 5.16 | 10.31 | 15.47 | 20.62 | 20.62 |
| 25-29 | R    | 53.76 | 10.75 | 21.50 | 32.26 | 43.01 | 43.01 | R     | 33.82 | 6.76 | 13.53 | 20.29 | 27.06 | 27.06 |
|       | L    | 48.60 | 9.72  | 19.44 | 29.16 | 38.88 | 38.88 | L     | 30.31 | 6.06 | 12.12 | 18.19 | 24.25 | 24.25 |
| 30-34 | R    | 52.63 | 10.53 | 21.05 | 31.58 | 42.10 | 42.10 | R     | 33.97 | 6.79 | 13.59 | 20.38 | 27.18 | 27.18 |
|       | L    | 48.98 | 9.80  | 19.59 | 29.39 | 39.18 | 39.18 | L     | 31.64 | 6.33 | 12.66 | 18.98 | 25.31 | 25.31 |
| 35-39 | R    | 53.16 | 10.63 | 21.26 | 31.90 | 42.53 | 42.53 | R     | 32.46 | 6.49 | 12.98 | 19.48 | 25.97 | 25.97 |
|       | L    | 51.75 | 10.35 | 20.70 | 31.05 | 41.40 | 41.40 | L     | 29.77 | 5.95 | 11.91 | 17.86 | 23.82 | 23.82 |
| 40-44 | R    | 55.49 | 11.10 | 22.20 | 33.29 | 44.39 | 44.39 | R     | 30.34 | 6.07 | 12.14 | 18.20 | 24.27 | 24.27 |
|       | L    | 50.40 | 10.08 | 20.16 | 30.24 | 40.32 | 40.32 | L     | 26.23 | 5.25 | 10.49 | 15.74 | 20.98 | 20.98 |
| 45-49 | R    | 49.93 | 9.99  | 19.97 | 29.96 | 39.94 | 39.94 | R     | 35.30 | 7.06 | 14.12 | 21.18 | 28.24 | 28.24 |
|       | L    | 48.94 | 9.79  | 19.58 | 29.36 | 39.15 | 39.15 | L     | 32.06 | 6.41 | 12.82 | 19.24 | 25.65 | 25.65 |
| 50-54 | R    | 48.40 | 9.68  | 19.36 | 29.04 | 38.72 | 38.72 | R     | 28.37 | 5.67 | 11.35 | 17.02 | 22.70 | 22.70 |
|       | L    | 41.46 | 8.29  | 16.58 | 24.88 | 33.17 | 33.17 | L     | 26.28 | 5.26 | 10.51 | 15.77 | 21.02 | 21.02 |
| 55-59 | R    | 45.71 | 9.14  | 18.28 | 27.43 | 36.57 | 36.57 | R     | 29.76 | 5.95 | 11.90 | 17.86 | 23.81 | 23.81 |
|       | L    | 42.16 | 8.43  | 16.86 | 25.30 | 33.73 | 33.73 | L     | 27.81 | 5.56 | 11.12 | 16.69 | 22.25 | 22.25 |
| 60-64 | R    | 40.59 | 8.12  | 16.24 | 24.35 | 32.47 | 32.47 | R     | 26.35 | 5.27 | 10.54 | 15.81 | 21.08 | 21.08 |
|       | L    | 37.25 | 7.45  | 14.90 | 22.35 | 29.80 | 29.80 | L     | 23.47 | 4.69 | 9.39  | 14.08 | 18.78 | 18.78 |
| 65-69 | R    | 40.87 | 8.17  | 16.35 | 24.52 | 32.70 | 32.70 | R     | 23.60 | 4.72 | 9.44  | 14.16 | 18.88 | 18.88 |
|       | L    | 36.57 | 7.31  | 14.63 | 21.94 | 29.26 | 29.26 | L     | 23.38 | 4.68 | 9.35  | 14.03 | 18.70 | 18.70 |
| 70-74 | R    | 37.48 | 7.50  | 14.99 | 22.49 | 29.98 | 29.98 | R     | 25.84 | 5.17 | 10.34 | 15.50 | 20.67 | 20.67 |
|       | L    | 35.49 | 7.10  | 14.20 | 21.29 | 28.39 | 28.39 | L     | 22.92 | 4.58 | 9.17  | 13.75 | 18.34 | 18.34 |
| 75+   | R    | 32.76 | 6.55  | 13.10 | 19.66 | 26.21 | 26.21 | R     | 19.40 | 3.88 | 7.76  | 11.64 | 15.52 | 15.52 |
|       | L    | 28.59 | 5.72  | 11.44 | 17.15 | 22.87 | 22.87 | L     | 17.64 | 3.53 | 7.06  | 10.58 | 14.11 | 14.11 |

Gilbertson, L. and Barber-Lomax, S. (1994), 'Power and Pinch Grip Strength Recorded Using the Hand-Held Jamar Dynamometer and B+L Hydraulic Pinch Guage: British Normative Data for Adults', *British Journal of Occupational Therapy*, 57 (12), pp. 483-488.

The Chelsea Critical Care Physical Assessment tool (CPAx)

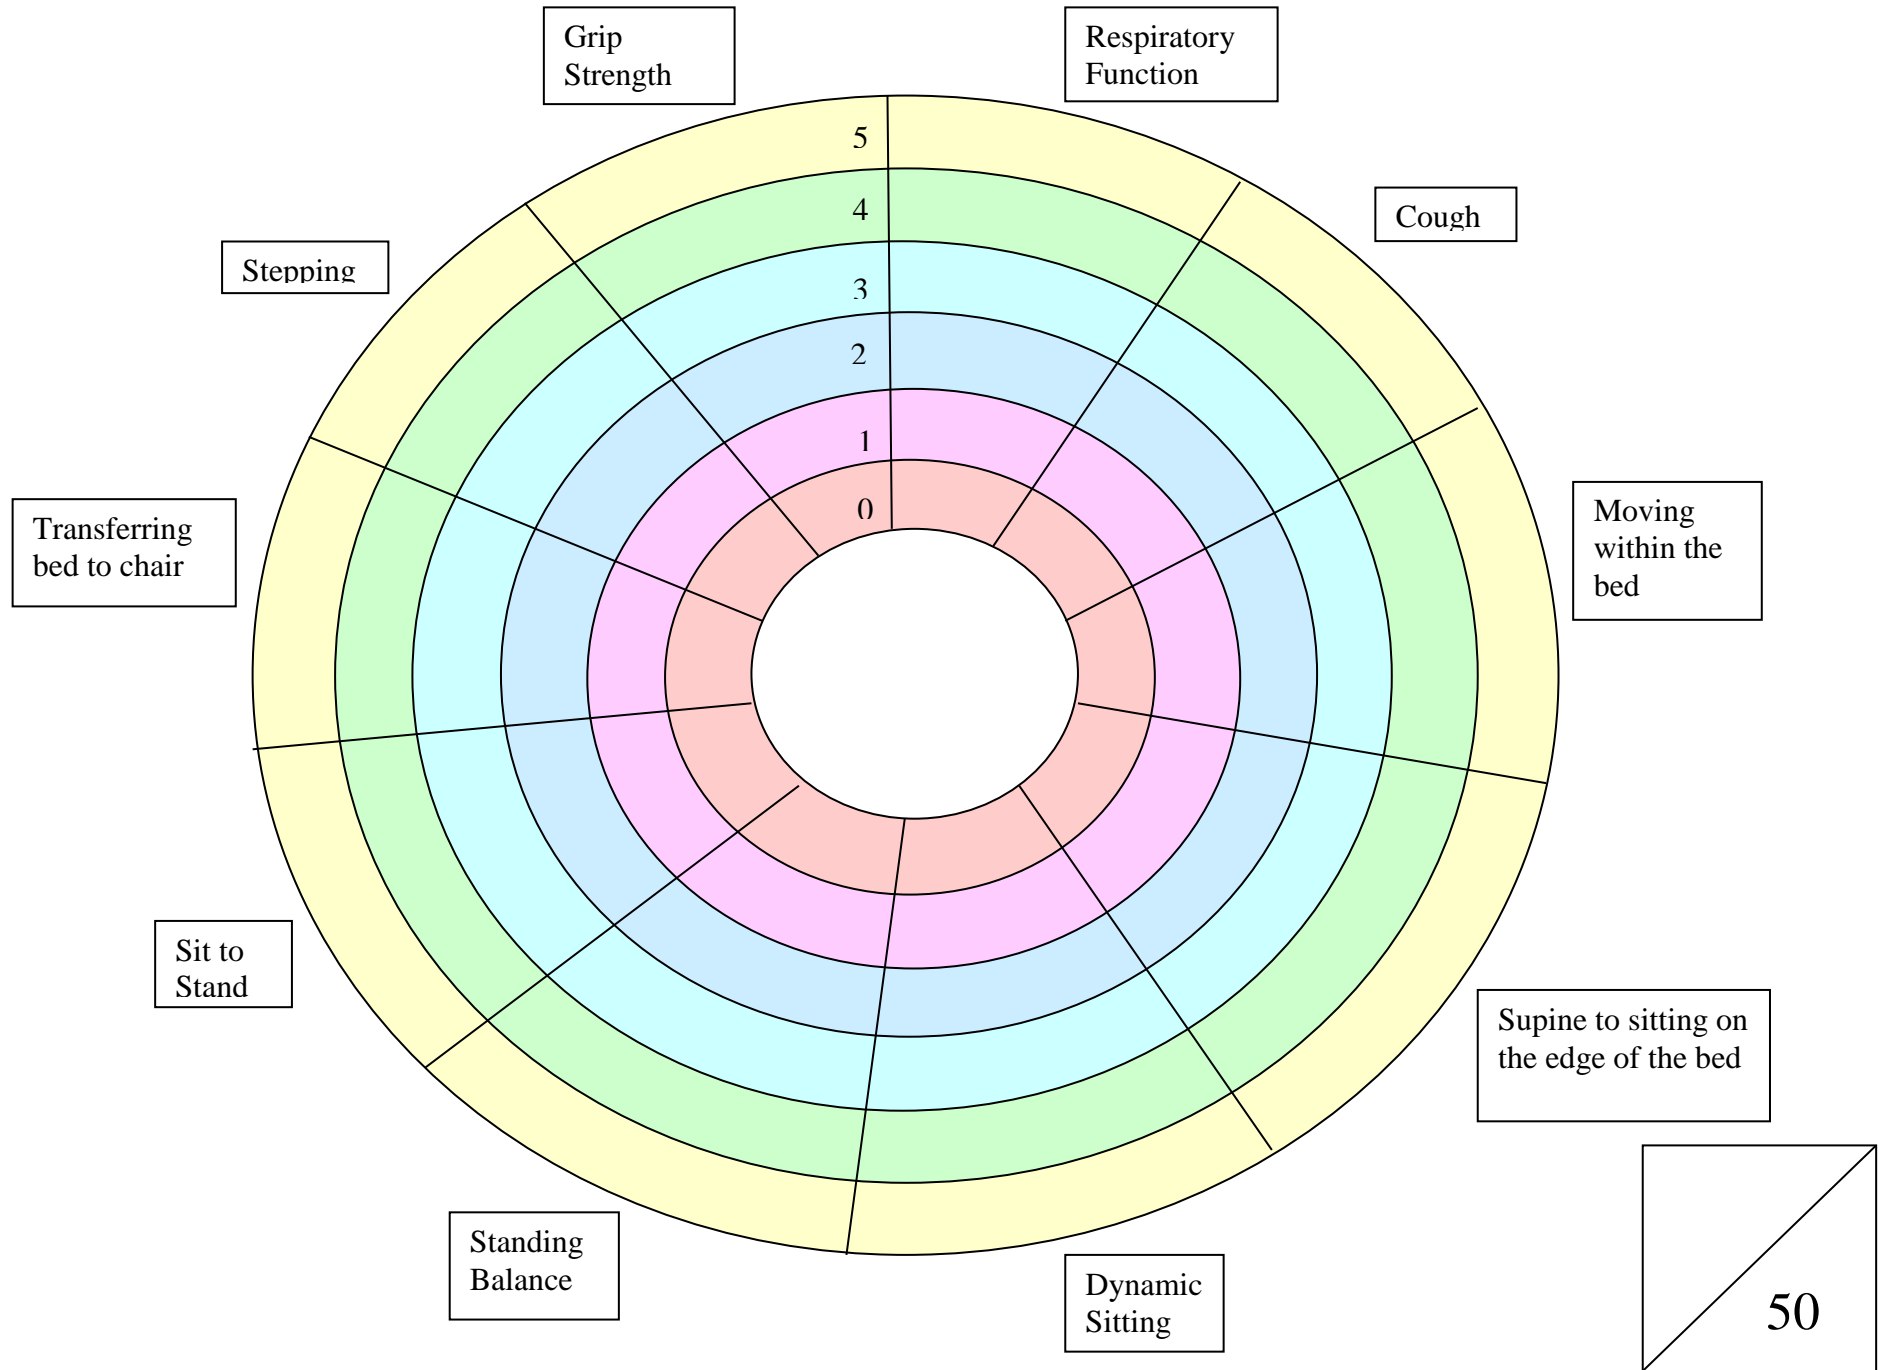

Supplement: cc13801-S1.pdf [file cc13801-S1.pdf]
